# Supplementary material for: Regional and patient-related factors influencing the willingness to use general practitioners as coordinators of the treatment in northern Germany - results of a cross-sectional observational study
Source: PubMed Central journal article supplement (PMC7302141; doi:10.1186/s12875-020-01180-3), 2020-06-17
Supplement: 12875_2020_1180_MOESM1_ESM.pdf [file 12875_2020_1180_MOESM1_ESM.pdf]

**Additional file 1:**

**Table A: planned and completed size in the region „urban areas“**

| <b>Administration district</b> | <b>Inhabitants</b> | <b>GPs planned</b> | <b>Recruited GPs</b> | <b>Contacted patients</b> | <b>GPs of participating patients</b> | <b>Interviewed patients</b> |
|--------------------------------|--------------------|--------------------|----------------------|---------------------------|--------------------------------------|-----------------------------|
| <b>Bremen</b>                  |                    |                    |                      |                           |                                      |                             |
| - Bremen Centre                | 18.231             | 1                  | 2                    | 30                        | 1                                    | <b>5</b>                    |
| - Bremen North                 | 97.460             | 3                  | 5                    | 75                        | 5                                    | <b>26</b>                   |
| - Bremen East                  | 223.753            | 6                  | 2                    | 15                        | 1                                    | <b>9</b>                    |
| - Bremen South                 | 126.710            | 3                  | 2                    | 30                        | 2                                    | <b>9</b>                    |
| - Bremen West                  | 91.310             | 2                  | 5                    | 60                        | 4                                    | <b>13</b>                   |
| <b>Bremerhaven</b>             | 114.025            | 3                  | 3                    | 30                        | 2                                    | <b>8</b>                    |
| <b>Hamburg</b>                 |                    |                    |                      |                           |                                      |                             |
| - Hamburg Altona               | 267.058            | 7                  | 11                   | 150                       | 8                                    | <b>32</b>                   |
| - Hamburg Bergedorf            | 124.998            | 4                  | 4                    | 45                        | 3                                    | <b>12</b>                   |
| - Hamburg Eimsbüttel           | 258.865            | 7                  | 2                    | 30                        | 2                                    | <b>7</b>                    |
| - Hamburg Harburg              | 160.211            | 4                  | 5                    | 60                        | 3                                    | <b>9</b>                    |
| - Hamburg Centre               | 296.410            | 8                  | 10                   | 120                       | 6                                    | <b>13</b>                   |
| - Hamburg North                | 302.242            | 8                  | 10                   | 120                       | 6                                    | <b>34</b>                   |
| - Hamburg Wandsbek             | 424.146            | 11                 | 13                   | 150                       | 8                                    | <b>36</b>                   |
| <b>Kiel</b>                    | 246.306            | 7                  | 4                    | 45                        | 2                                    | <b>14</b>                   |
| <b>Lübeck</b>                  | 216.253            | 6                  | 4                    | 60                        | 1                                    | <b>1</b>                    |
|                                |                    | 80                 | 82                   | 1.020                     | 54                                   | <b>228</b>                  |

**Table B: planned and completed sample size in the region “environs”**

| <b>Administration district</b> | <b>Inhabitants</b> | <b>GPs planned</b> | <b>Recruited GPs</b> | <b>Contacted patients</b> | <b>GPs of participating patients</b> | <b>Interviewed patients</b> |
|--------------------------------|--------------------|--------------------|----------------------|---------------------------|--------------------------------------|-----------------------------|
| <b>Altmarkkreis Salzwedel</b>  | 86.164             | 2                  | 4                    | 45                        | 2                                    | <b>11</b>                   |
| <b>Delmenhorst</b>             | 76.323             | 2                  | 1                    | 0                         | 0                                    | <b>0</b>                    |
| <b>Diepholz</b>                | 16.692             | 1                  | 0                    | 0                         | 0                                    | <b>0</b>                    |
| <b>Harburg</b>                 | 248.122            | 7                  | 9                    | 105                       | 7                                    | <b>36</b>                   |
| <b>Herzogtum Lauenburg</b>     | 192.999            | 5                  | 7                    | 45                        | 3                                    | <b>6</b>                    |
| <b>Neumünster</b>              | 79.197             | 2                  | 3                    | 45                        | 3                                    | <b>17</b>                   |
| <b>Nordwestmecklenburg</b>     | 156.270            | 4                  | 6                    | 75                        | 5                                    | <b>17</b>                   |
| <b>Oldenburg</b>               | 128.608            | 4                  | 2                    | 30                        | 2                                    | <b>9</b>                    |
| <b>Osterholz</b>               | 113.579            | 3                  | 0                    | 0                         | 0                                    | <b>0</b>                    |
| <b>Ostholstein</b>             | 199.574            | 5                  | 5                    | 60                        | 3                                    | <b>9</b>                    |
| <b>Pinneberg</b>               | 307.471            | 8                  | 12                   | 135                       | 9                                    | <b>36</b>                   |
| <b>Plön</b>                    | 128.304            | 4                  | 4                    | 45                        | 3                                    | <b>10</b>                   |
| <b>Rendsburg-Eckernförde</b>   | 270.378            | 7                  | 11                   | 150                       | 9                                    | <b>35</b>                   |
| <b>Schwerin</b>                | 96.800             | 3                  | 3                    | 45                        | 1                                    | <b>4</b>                    |
| <b>Segeberg</b>                | 267.503            | 7                  | 8                    | 105                       | 6                                    | <b>29</b>                   |
| <b>Stade</b>                   | 200.054            | 5                  | 13                   | 105                       | 6                                    | <b>29</b>                   |
| <b>Stormarn</b>                | 239.614            | 7                  | 8                    | 90                        | 4                                    | <b>13</b>                   |
| <b>Verden</b>                  | 134.645            | 4                  | 5                    | 45                        | 3                                    | <b>8</b>                    |
|                                |                    | <b>80</b>          | <b>101</b>           | <b>1.125</b>              | <b>66</b>                            | <b>269</b>                  |

**Table C: planned and completed sample size in the region “rural areas”**

| <b>Administration district*</b> | <b>Inhabitants</b> | <b>GPs planned</b> | <b>Recruited GPs</b> | <b>Contacted patients</b> | <b>GPs of participating patients</b> | <b>Interviewed patients</b> |
|---------------------------------|--------------------|--------------------|----------------------|---------------------------|--------------------------------------|-----------------------------|
| <b>Celle</b>                    |                    |                    |                      |                           |                                      |                             |
| - City of Celle                 | 69.748             | 2                  | 1                    | 0                         | 0                                    | <b>0</b>                    |
| - rural area                    | 108.223            | 4                  | 8                    | 60                        | 4                                    | <b>18</b>                   |
| <b>Cuxhaven</b>                 |                    |                    |                      |                           |                                      |                             |
| - City of Cuxhaven              | 48.264             | 2                  | 1                    | 0                         | 0                                    | <b>0</b>                    |
| - City of Geestland             | 30.936             | 1                  | 0                    | 0                         | 0                                    | <b>0</b>                    |
| - rural area                    | 118.903            | 4                  | 5                    | 75                        | 5                                    | <b>30</b>                   |
| <b>Dithmarschen</b>             |                    |                    |                      |                           |                                      |                             |
| - City of Heide                 | 21.422             | 1                  | 0                    | 0                         | 0                                    | <b>0</b>                    |
| - rural area                    | 111.495            | 4                  | 10                   | 105                       | 6                                    | <b>31</b>                   |
| <b>Gifhorn</b>                  |                    |                    |                      |                           |                                      |                             |
| - City of Gifhorn               | 41.905             | 1                  | 1                    | 15                        | 1                                    | <b>1</b>                    |
| - rural area                    | 132.300            | 5                  | 3                    | 15                        | 1                                    | <b>1</b>                    |
| <b>Heidekreis</b>               |                    |                    |                      |                           |                                      |                             |
| - City of Soltau                | 21.414             | 1                  | 1                    | 0                         | 0                                    | <b>0</b>                    |
| - City of Walsrode              | 23.219             | 1                  | 3                    | 30                        | 2                                    | <b>7</b>                    |
| - rural area                    | 95.631             | 3                  | 5                    | 60                        | 4                                    | <b>14</b>                   |
| <b>Ludwigslust-Parchim</b>      | 214.113            | 8                  | 8                    | 75                        | 4                                    | <b>16</b>                   |
| <b>Lüchow-Dannenberg</b>        | 50.128             | 2                  | 9                    | 120                       | 6                                    | <b>13</b>                   |
| <b>Lüneburg</b>                 |                    |                    |                      |                           |                                      |                             |
| - City of Lüneburg              | 74.072             | 3                  | 4                    | 30                        | 2                                    | <b>14</b>                   |
| - rural area                    | 106.647            | 4                  | 5                    | 60                        | 4                                    | <b>32</b>                   |
| <b>Nienburg</b>                 |                    |                    |                      |                           |                                      |                             |
| - City of Nienburg              | 31.193             | 1                  | 2                    | 30                        | 2                                    | <b>8</b>                    |
| - rural area                    | 89.439             | 3                  | 2                    | 30                        | 2                                    | <b>10</b>                   |
| <b>North Frisia</b>             |                    |                    |                      |                           |                                      |                             |
| - City of Husum                 | 22.430             | 1                  | 1                    | 15                        | 1                                    | <b>4</b>                    |
| - rural area                    | 141.260            | 5                  | 7                    | 105                       | 5                                    | <b>26</b>                   |
| <b>Rotenburg (Wümme)</b>        |                    |                    |                      |                           |                                      |                             |
| - City of Rotenburg             | 21.392             | 1                  | 0                    | 0                         | 0                                    | <b>0</b>                    |
| - rural area                    | 141.861            | 5                  | 4                    | 45                        | 3                                    | <b>26</b>                   |
| <b>Schleswig-Flensburg</b>      |                    |                    |                      |                           |                                      |                             |
| - City of Schleswig             | 24.266             | 1                  | 0                    | 0                         | 0                                    | <b>0</b>                    |
| - rural area                    | 172.573            | 6                  | 4                    | 45                        | 3                                    | <b>18</b>                   |
| <b>Steinburg</b>                |                    |                    |                      |                           |                                      |                             |
| - City of Itzehoe               | 31.771             | 1                  | 2                    | 30                        | 2                                    | <b>5</b>                    |
| - rural area                    | 99.686             | 4                  | 4                    | 45                        | 3                                    | <b>13</b>                   |
| <b>Uelzen</b>                   |                    |                    |                      |                           |                                      |                             |
| - City of Uelzen                | 33.782             | 1                  | 0                    | 0                         | 0                                    | <b>0</b>                    |
| - rural area                    | 59.349             | 2                  | 5                    | 60                        | 4                                    | <b>21</b>                   |
| <b>Wesermarsch</b>              |                    |                    |                      |                           |                                      |                             |
| - City of Nordenham             | 26.325             | 1                  | 0                    | 0                         | 0                                    | <b>0</b>                    |
| - rural area                    | 62.914             | 2                  | 2                    | 30                        | 2                                    | <b>6</b>                    |
|                                 |                    | <b>80</b>          | <b>97</b>            | <b>1.080</b>              | <b>66</b>                            | <b>314</b>                  |

\* stratified by cities of more than 20,000 inhabitants and rural areas.
