# Supplementary material for: Regional and patient-related factors influencing the willingness to use general practitioners as coordinators of the treatment in northern Germany - results of a cross-sectional observational study
Source: BMC Fam Pract. 2020 Jun 17;21:110. doi: 10.1186/s12875-020-01180-3 (PMC7302141; doi:10.1186/s12875-020-01180-3)
Supplement: Supplementary file 2 — Additional file 2. German version of the questionnaire on intensity of the commitment to the GP [file 12875_2020_1180_MOESM2_ESM.pdf]

## Fragebogen zur Intensität der Hausarztbindung (F-HaBi)

Als nächstes würden wir von Ihnen gerne einige Informationen zu Ihrer hausärztlichen Versorgung haben.

|                                                          |
|----------------------------------------------------------|
| <b>F-HaBi1 Haben Sie einen Hausarzt/eine Hausärztin?</b> |
| <input type="checkbox"/> ja                              |
| <input type="checkbox"/> nein                            |

|                                                                                                                                                                                                                 |
|-----------------------------------------------------------------------------------------------------------------------------------------------------------------------------------------------------------------|
| <b>F-HaBi2 Wenn ja, wie häufig suchen Sie Ihren Hausarzt/Ihre Hausärztin pro Jahr auf?</b><br><i>Kommentar: gemeint sind alle Besuche mit direkten Arztkontakt (nicht nur Rezept abholen) sowie Hausbesuche</i> |
| <input type="text"/> <input type="text"/> <input type="text"/> <input type="text"/> mal                                                                                                                         |

| Inwieweit trifft jede der folgenden Aussagen auf Sie zu?                                                                                    | trifft ganz zu           | trifft weitgehend zu     | weiß nicht               | trifft weitgehend nicht zu | trifft überhaupt nicht zu |
|---------------------------------------------------------------------------------------------------------------------------------------------|--------------------------|--------------------------|--------------------------|----------------------------|---------------------------|
| <b>F-HaBi3</b> Wenn ich ein Gesundheitsproblem habe, suche ich zuerst meinen Hausarzt/meine Hausärztin auf.                                 | <input type="checkbox"/> | <input type="checkbox"/> | <input type="checkbox"/> | <input type="checkbox"/>   | <input type="checkbox"/>  |
| <b>F-HaBi4</b> Wenn ich denke, dass ich zu einem Facharzt/Spezialisten muss, bespreche ich das vorab mit meinem Hausarzt/meiner Hausärztin. | <input type="checkbox"/> | <input type="checkbox"/> | <input type="checkbox"/> | <input type="checkbox"/>   | <input type="checkbox"/>  |
| <b>F-HaBi5</b> Ich hole mir von meinem Hausarzt/meiner Hausärztin eine Überweisung, um zum Facharzt/Spezialisten zu gehen.                  | <input type="checkbox"/> | <input type="checkbox"/> | <input type="checkbox"/> | <input type="checkbox"/>   | <input type="checkbox"/>  |
| <b>F-HaBi6</b> Ich bespreche mit meinem Hausarzt/meiner Hausärztin die Ergebnisse von Terminen bei anderen Fachärzten/Spezialisten.         | <input type="checkbox"/> | <input type="checkbox"/> | <input type="checkbox"/> | <input type="checkbox"/>   | <input type="checkbox"/>  |
| <b>F-HaBi7</b> Ich vertraue meinem Hausarzt/meiner Hausärztin mehr als anderen Ärzten.                                                      | <input type="checkbox"/> | <input type="checkbox"/> | <input type="checkbox"/> | <input type="checkbox"/>   | <input type="checkbox"/>  |
| <b>F-HaBi8</b> Mein Hausarzt/meine Hausärztin gibt mir sehr gute Informationen über meine Behandlung.                                       | <input type="checkbox"/> | <input type="checkbox"/> | <input type="checkbox"/> | <input type="checkbox"/>   | <input type="checkbox"/>  |
